# Supplementary material for: Deep eutectic solvent choline chloride·2CrCl3·6H2O: an efficient catalyst for esterification of formic and acetic acid at room temperature
Source: Royal Society of Chemistry journal article supplement (doi:10.1039/c6ra01029f), 2016-01-01

## Electronic Supplementary Information

### Deep eutectic solvents choline chloride·2CrCl<sub>3</sub>·6H<sub>2</sub>O: an efficient catalyst for esterification of formic and acetic acid at room temperature

Jin Cao, Bin Qi, Yuhang Shang, Huiwen Liu, Wenjing Wang, Jia Lv, Zhiyan Chen,  
Haibo Zhang\* and Xiaohai Zhou

#### Table of Contents

|                                                                                                               |   |
|---------------------------------------------------------------------------------------------------------------|---|
| 1. Experimental section.....                                                                                  | 1 |
| 2. The calculation of the yield n-butyl acetate by GC .....                                                   | 4 |
| 3. Representative examples of GC chromatograms from reaction mixtures.....                                    | 4 |
| 4. Characterization data and spectra for n-butyl acetate.....                                                 | 5 |
| 5.The effect of temperature on the esterification reaction with [ChCl] [FeCl <sub>3</sub> ] <sub>2</sub> .... | 6 |
| 6.The GC-MS spectra of esters (Table 4) .....                                                                 | 6 |

## 1. Experimental section

**Materials.** All reagents and solvents for syntheses were purchased from commercial sources and used without further purification.

**Measurements.** The analysis of the reaction mixture was carried out on a gas chromatograph (sp-6890) equipped with a flame ionization detector (FID) and a capillary column (HP-5, 30 m×0.25 mm×0.25 mm). The column temperature was 80 °C. The temperatures of the injector and detector were maintained at 320 °C and 320 °C, respectively. The products were further identified by GC (varian 3900)–MS (varian saturn 2100 T) equipped with a flame ionization detector (FID) and a capillary column (DB-5, 30 m×0.25 mm×0.25 mm). The  $^1\text{H}$  and  $^{13}\text{C}$  NMR spectra were recorded on a Bruker 400MHz NMR spectrometer at 298K. The chemical shifts ( $\delta$ ) were given in part per million relative to internal tetramethylsilane (TMS, 0 ppm for  $^1\text{H}$ ),  $\text{CDCl}_3$  (77.3 ppm for  $^{13}\text{C}$ ).

**Preparation of deep eutectic solvent [ChCl][CrCl<sub>3</sub>·6H<sub>2</sub>O]<sub>2</sub>.** A mixture of the chromium(iii) chloride hexahydrate (CrCl<sub>3</sub>·6H<sub>2</sub>O) and choline chloride in a molar ratio of 2:1 was heated to 70°C with gentle stirring until a green liquid formed.

**Preparation of deep eutectic solvent [ChCl][FeCl<sub>3</sub>]<sub>2</sub>.** A mixture of the ferric chloride (FeCl<sub>3</sub>) and choline chloride in a molar ratio of 2:1 was heated to 100°C with gentle stirring until a dark brown liquid formed.

**Preparation of deep eutectic solvent [ChCl][AlCl<sub>3</sub>·6H<sub>2</sub>O]<sub>2</sub>.** A mixture of the aluminum chloride hexahydrate (AlCl<sub>3</sub>·6H<sub>2</sub>O) and choline chloride in a molar ratio of 2:1 was heated to 70°C with gentle stirring until a colorless liquid formed.

**Preparation of deep eutectic solvent [ChCl][MgCl<sub>2</sub>·6H<sub>2</sub>O]<sub>2</sub>.** A mixture of the magnesium chloride hexahydrate (MgCl<sub>2</sub>·6H<sub>2</sub>O) and choline chloride in a molar ratio of 2:1 was heated to 70°C with gentle stirring until a green clear liquid formed.

**Preparation of deep eutectic solvent [ChCl][MnCl<sub>2</sub>·4H<sub>2</sub>O]<sub>2</sub>.** A mixture of the manganese(II) chloride tetrahydrate (MnCl<sub>2</sub>·4H<sub>2</sub>O) and choline chloride in a molar ratio of 2:1 was heated to 70°C with gentle stirring until a pink liquid formed.

**Preparation of deep eutectic solvent [ChCl][CoCl<sub>2</sub>·6H<sub>2</sub>O]<sub>2</sub>.** A mixture of the cobalt(II) chloride hexahydrate (CoCl<sub>2</sub>·6H<sub>2</sub>O) and choline chloride in a molar ratio of 2:1 was heated to 70°C with gentle stirring until a blue liquid formed.

**Preparation of deep eutectic solvent [ChCl][NiCl<sub>2</sub>·6H<sub>2</sub>O]<sub>2</sub>.** A mixture of the nickel chloride hexahydrate (NiCl<sub>2</sub>·6H<sub>2</sub>O) and choline chloride in a molar ratio of 2:1 was heated to 70°C with gentle stirring until a green liquid formed.

**Preparation of deep eutectic solvent [ChCl][CuCl<sub>2</sub>·2H<sub>2</sub>O]<sub>2</sub>.** A mixture of the cupric chloride (CuCl<sub>2</sub>·2H<sub>2</sub>O) and choline chloride in a molar ratio of 2:1 was heated to 70°C with gentle stirring until a brown liquid formed.

**Preparation of deep eutectic solvent [ChCl][ZnCl<sub>2</sub>]<sub>2</sub>.** A mixture of the Zinc chloride (ZnCl<sub>2</sub>) and choline chloride in a molar ratio of 2:1 was heated to 100°C with gentle stirring until a colorless liquid formed.

**Preparation of deep eutectic solvent [ChCl][SnCl<sub>2</sub>]<sub>2</sub>.** A mixture of the anhydrous stannous chloride (SnCl<sub>2</sub>) and choline chloride in a molar ratio of 2:1 was heated to 100°C with gentle stirring until a colorless liquid formed.

**The synthesis process of n-butyl acetate.** Carboxylic acids (0.10 mol 6.00g) and n-butanol (0.02 mol 1.48g) without solvent were added, and then the deep eutectic solvent [ChCl][CrCl<sub>3</sub>·6H<sub>2</sub>O]<sub>2</sub> (0.5mmol 0.3365g) was added to initiate the reaction. The reaction mixture was stirred at 25°C for 24h. After the reaction was completed, two clearly separated phases are formed, the upper liquid layer was spilled off with a Pasteur pipette, the lower layer formed by DES, water and excess starting material was extracted with diethyl ether three times. The combined organic layers were washed with saturated aqueous NaHCO<sub>3</sub> three times and dried over anhydrous Mg<sub>2</sub>SO<sub>4</sub>, filtered, and then the solvent was removed by rotary evaporation to obtain n-butyl acetate 1.99g (isolated yield=85.7%).

**Recycle process of DES.** After the reaction was completed, two clearly separated phases are formed, the upper liquid layer was spilled off with a Pasteur pipette, the lower layer formed by DES, water and excess starting material was extracted with diethyl ether three times. A drying in vacuo at 60°C overnight was carried out on DES for further cycles.

## 2.The calculation of the yield n-butyl acetate by GC

The yield of esters and the selectivity to esters was calculated using equations (1-2), via GC with 1,4-dimethyl-benzene as internal standard, in which the number of moles was determined by Internal Standard Method from the chromatographic analysis (BA-n-butyl acetate, PX-1,4-dimethyl-benzene) (n-butyl acetate's standard curve:  $y=1.9754x-0.0500$  with  $R^2=0.9997$ , where  $y=m_{BA}/m_{PX}$  and  $x=A_{BA}/A_{PX}$  with A being the integral area of GC).

$$m_{BA}=m_{PX} \times (1.9754 \times A_{BA}/A_{PX} - 0.0500) \quad (1)$$

$$\text{Yield}_{BA} = (m_{BA}/116) / (m_{\text{butanol}}/74) \times 100\% \quad (2)$$

After the reaction was completed, liquid samples were analyzed on a gas chromatograph after addition of the internal standard. The yield of n-butyl acetate was calculated using equations (1-2).

## 3.Representative examples of GC chromatograms from reaction mixtures

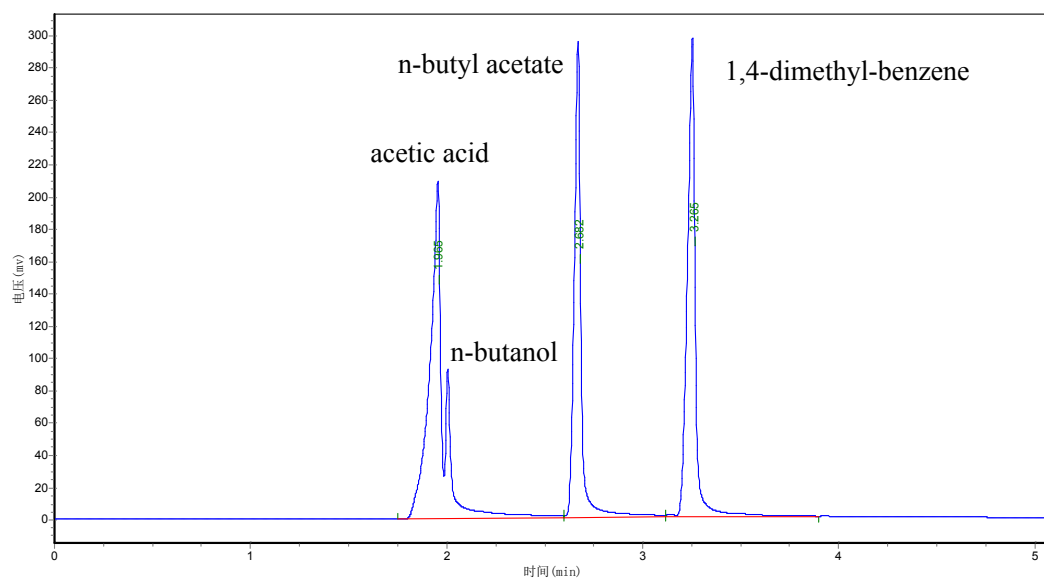

Fig S1 Representative examples of GC chromatograms from reaction mixtures

#### 4.Characterization data and spectra for n-butyl acetate

$\delta_{\text{H}}$  (400 MHz,  $\text{CDCl}_3$ ) 4.01, 1.99, 1.56, 1.34, 0.89.  $\delta_{\text{C}}$  (101 MHz,  $\text{CDCl}_3$ ) 171.33, 64.37, 30.57, 20.87, 19.05, 13.60.

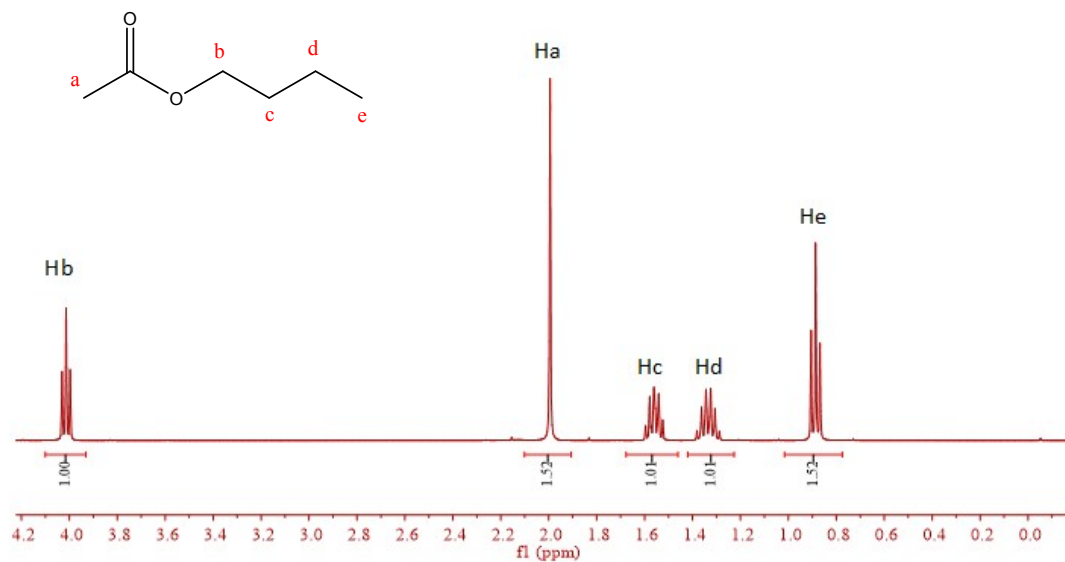

Fig S2  $^1\text{H}$  NMR spectrum of n-butyl acetate ( $\text{CDCl}_3$ ; 400MHz).

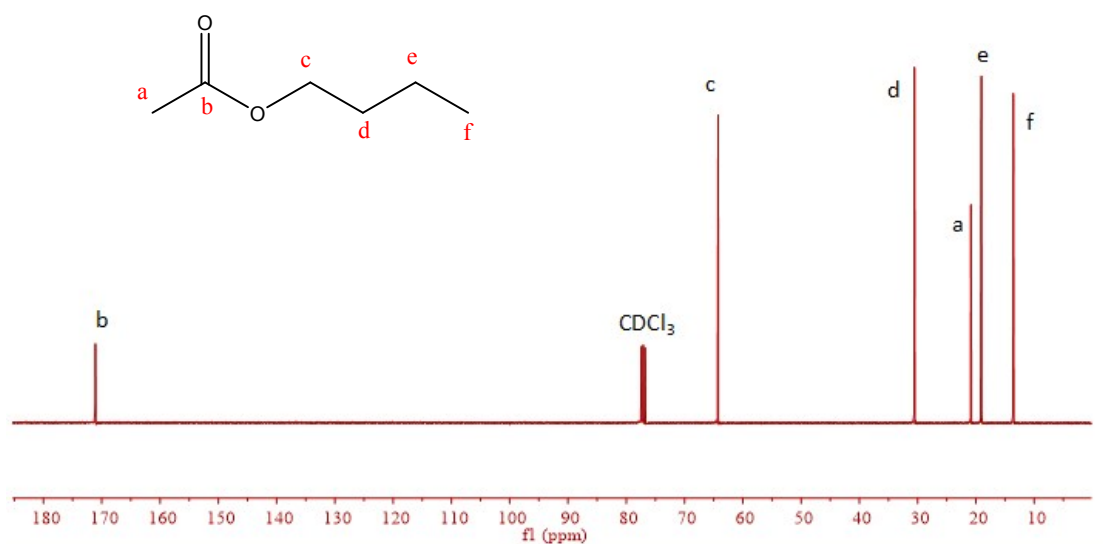

Fig S3  $^{13}\text{C}$  NMR spectrum of n-butyl acetate ( $\text{CDCl}_3$ ; 100MHz).

## 5.The effect of temperature on the esterification reaction with $[\text{ChCl}] [\text{FeCl}_3]_2$

**Table S1 The effect of temperature on the esterification reaction with [ChCl] [FeCl<sub>3</sub>]<sub>2</sub> <sup>a</sup>**

| Entry | Temperature | Yield of n-butyl acetate <sup>b</sup> |
|-------|-------------|---------------------------------------|
| 1     | 25°C        | 64.5%                                 |
| 2     | 30°C        | 66.9%                                 |
| 3     | 40°C        | 71.3%                                 |
| 4     | 50°C        | 78.4%                                 |
| 5     | 60°C        | 79.9%                                 |
| 6     | 70°C        | 79.5%                                 |
| 7     | 80°C        | 78.5%                                 |

<sup>a</sup> Reaction conditions: n-butanol (0.01 mol), acetic acid (0.05 mol), and DES (0.25 mmol) for 24h

<sup>b</sup> Yield are based on GC. 1,4-dimethyl-benzene as internal standard

## **6.The GC-MS spectra of esters (Table 4)**

(1) The GC-MS spectra of ethyl acetate



# Chromatogram Plot 1 - 9/7/2015 7:57 AM

File: d:\data\20150907\065-0.ms

Sample: Manual Sample

Scan Range: 1 - 1200 Time Range: 0.13 - 10.27 min.

Operator:

Date: 9/7/2015 7:39 AM

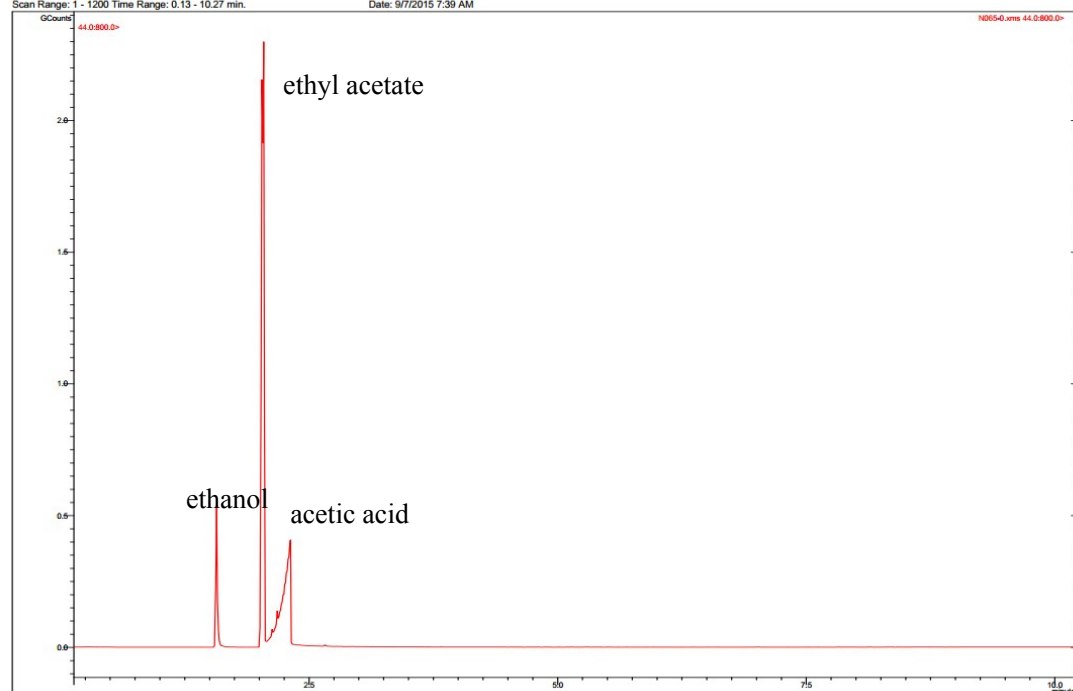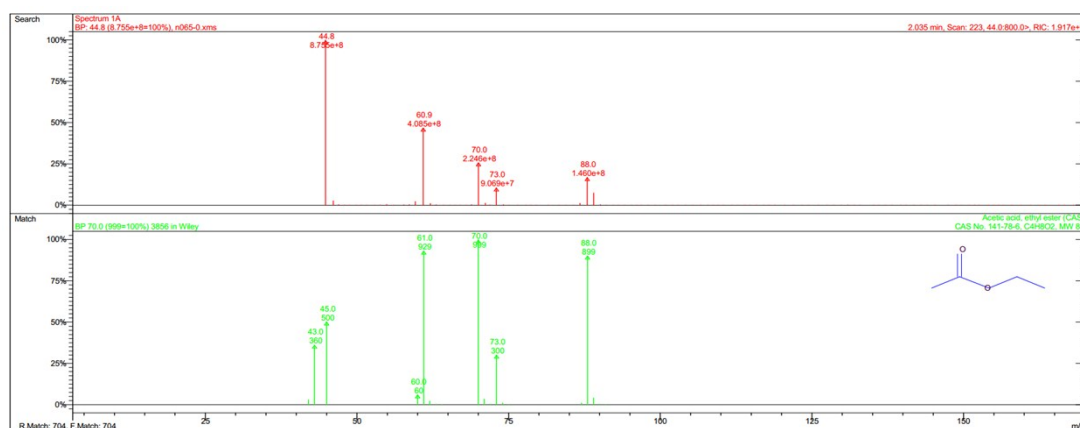

## □□The GC-MS spectra of n-propyl acetate

Chromatogram Plot 1 - 9/7/2015 8:11 AM

File: d:\data\2015\09\0907\n065-0001.xms

Sample: Manual Sample

Scan Range: 1 - 1197 Time Range: 0.14 - 10.26 min.

Operator:

Date: 9/7/2015 7:57 AM

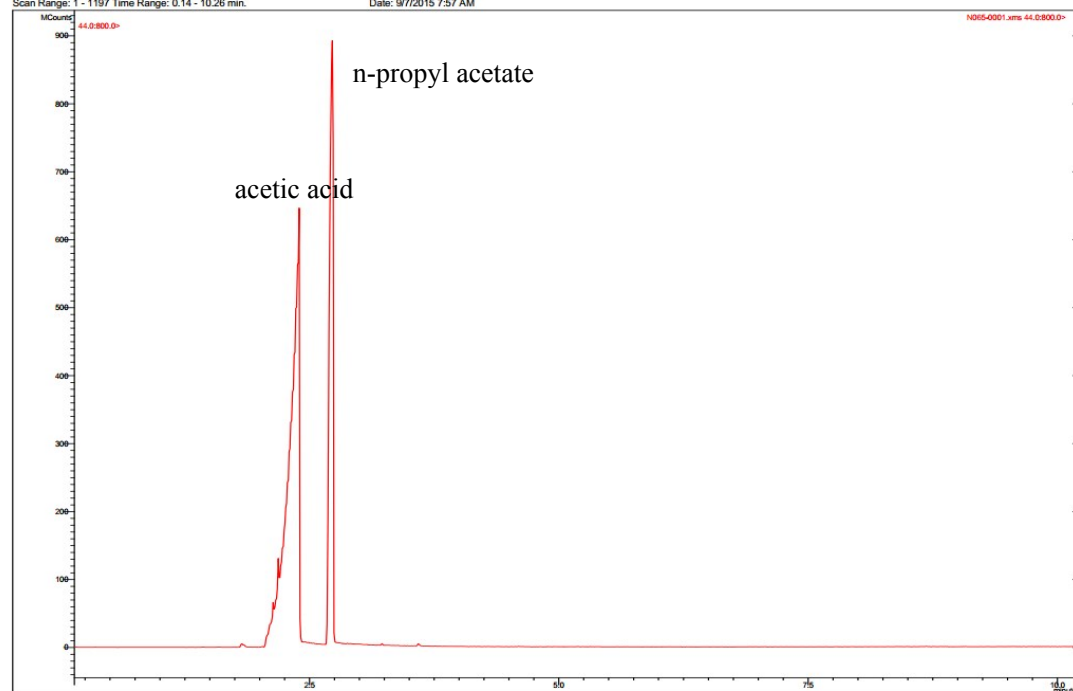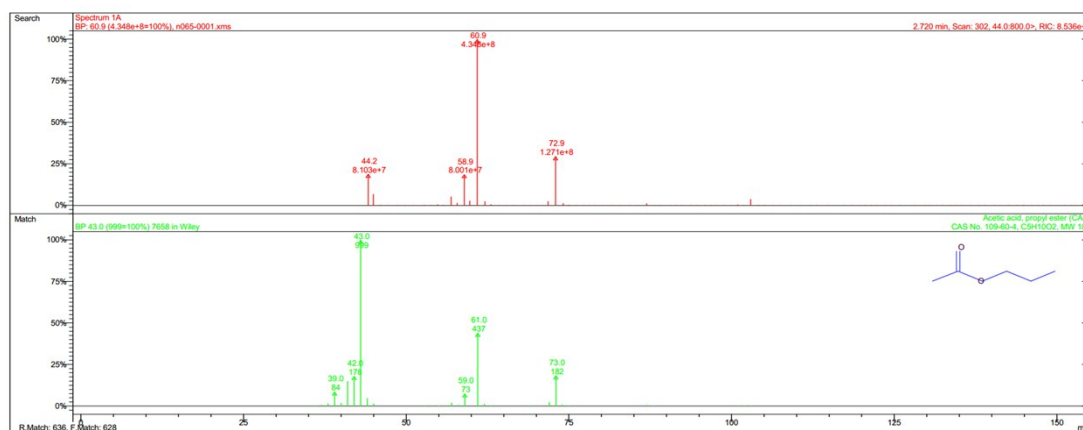

### 3 The GC-MS spectra of isopropyl acetate

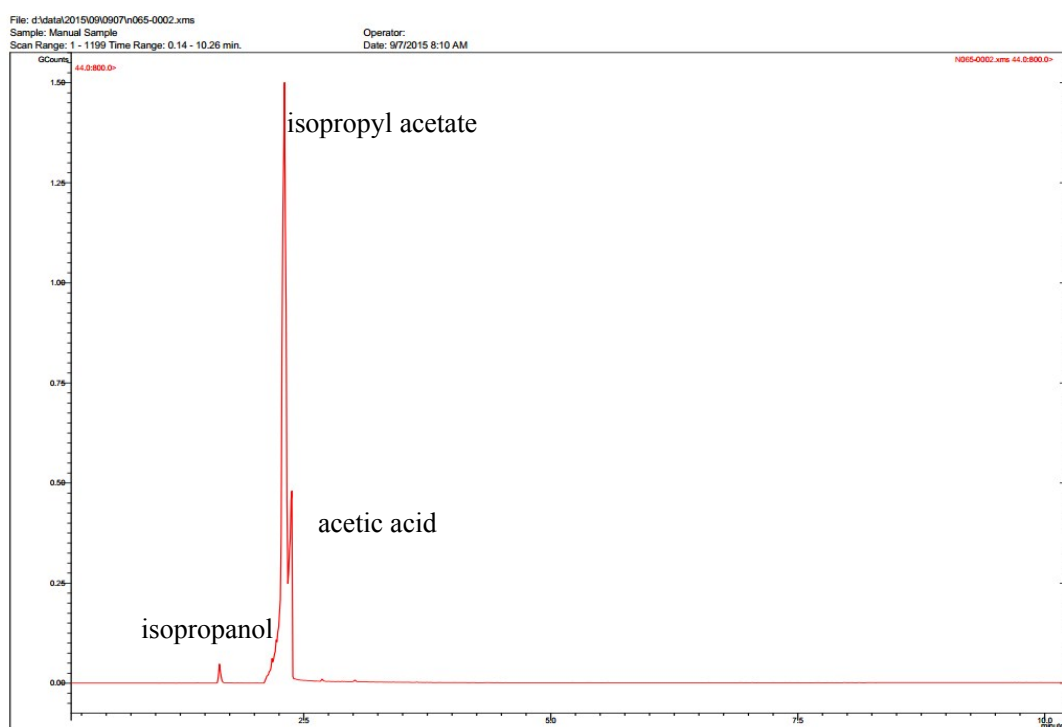

□4□The GC-MS spectra of n-butyl acetate

File: d:\data\2015\09\0907\n065-0003.xml  
 Sample: Manual Sample  
 Scan Range: 1 - 1191 Time Range: 0.16 - 10.28 min.

Operator:  
 Date: 9/7/2015 8:23 AM

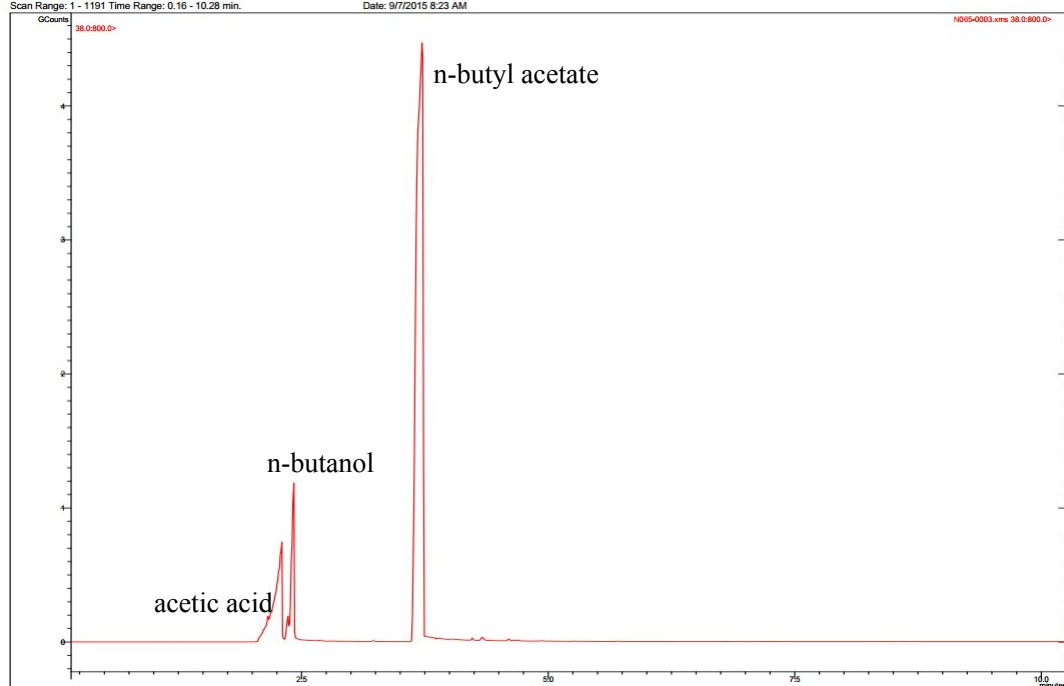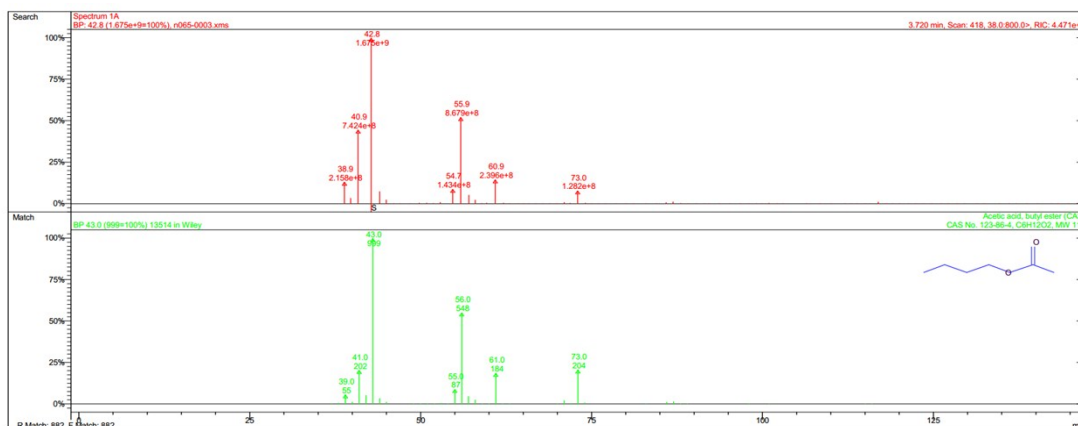

# (5) The GC-MS spectra of isoamyl acetate

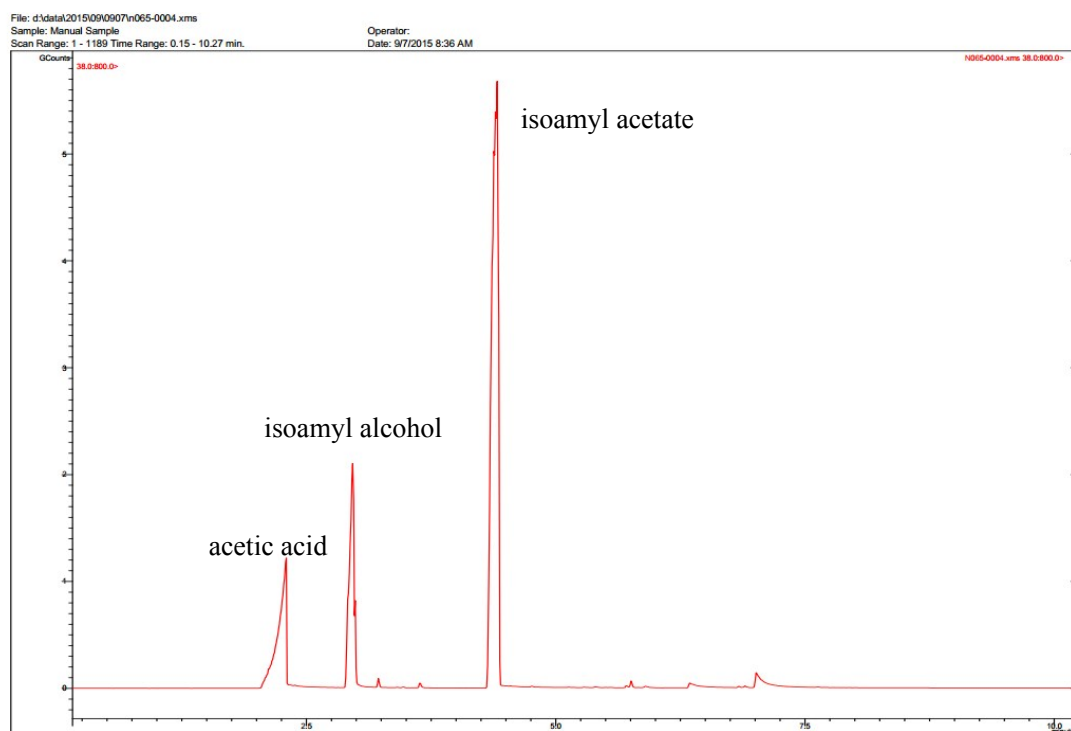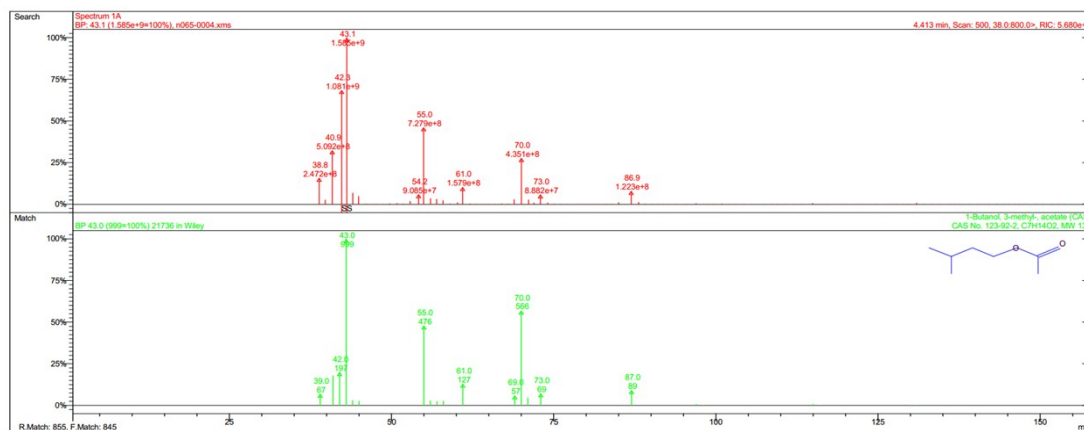

## (6) The GC-MS spectra of n-hexyl acetate

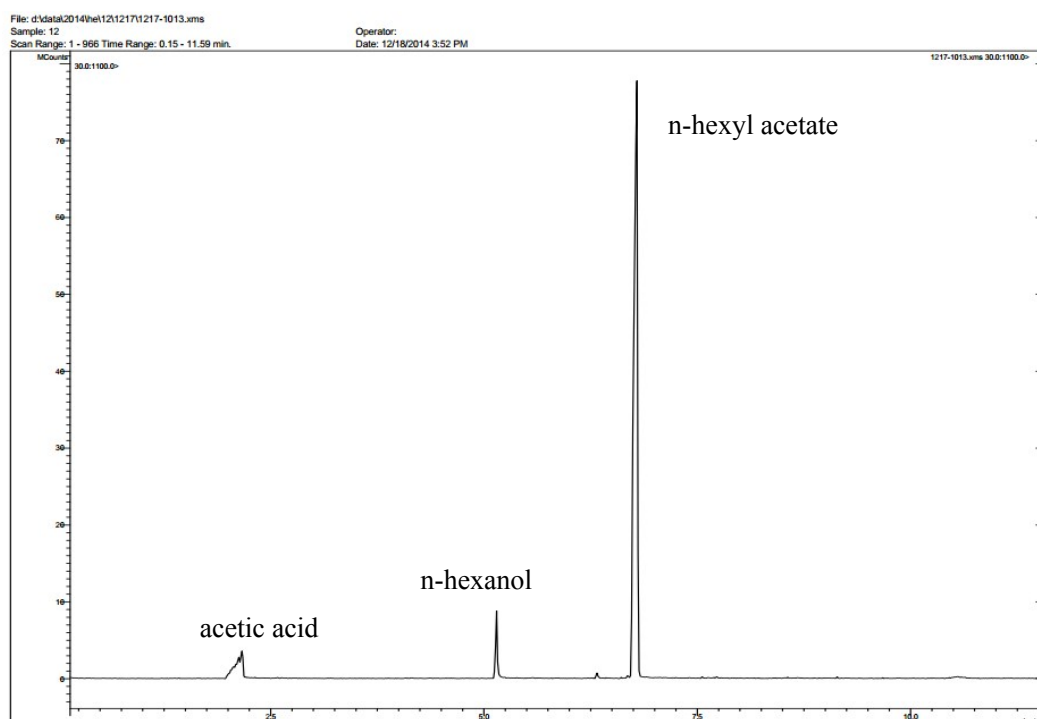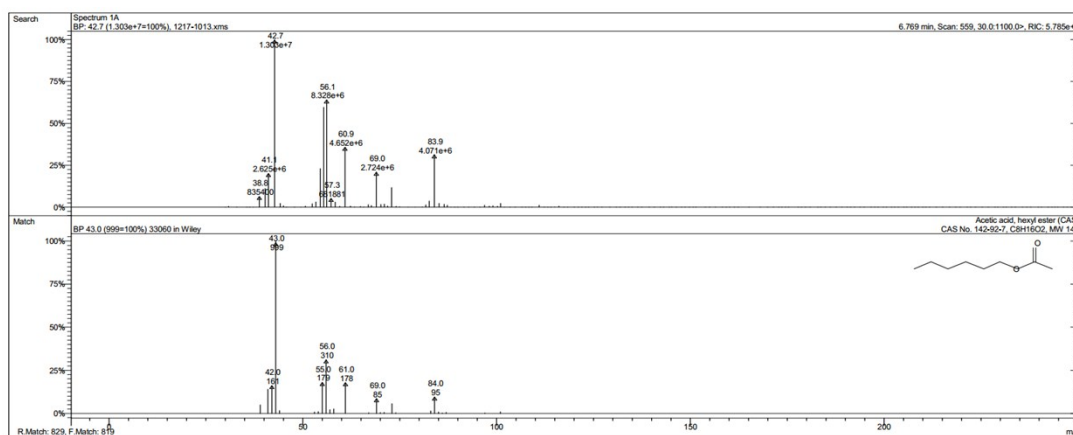

(7) The GC-MS spectra of n-octyl acetate

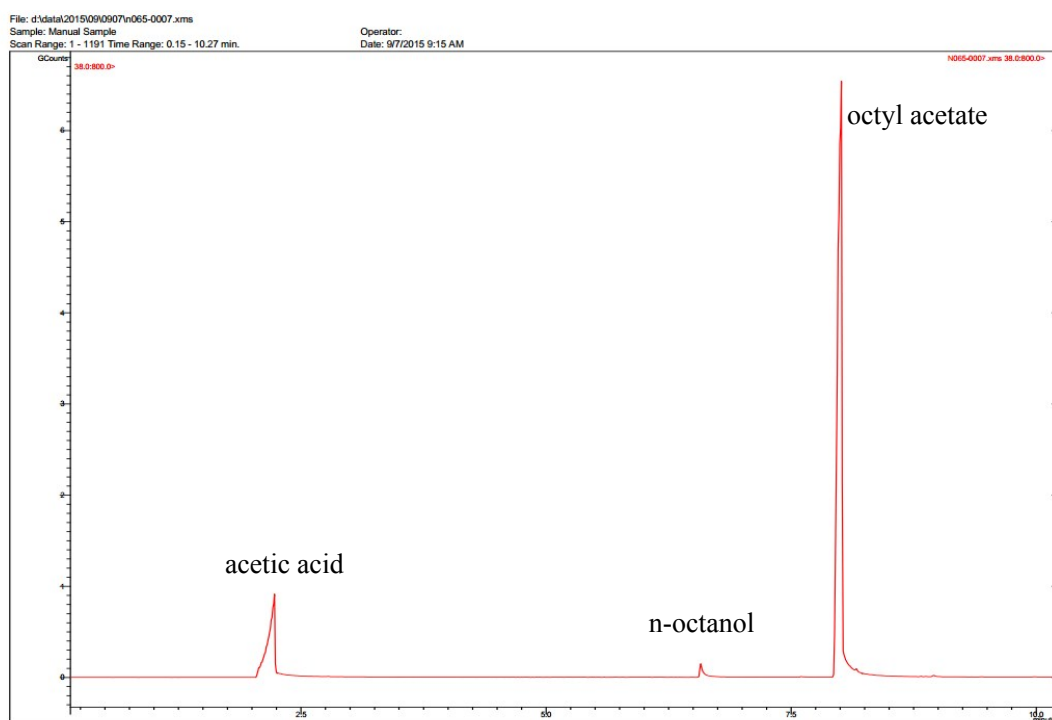



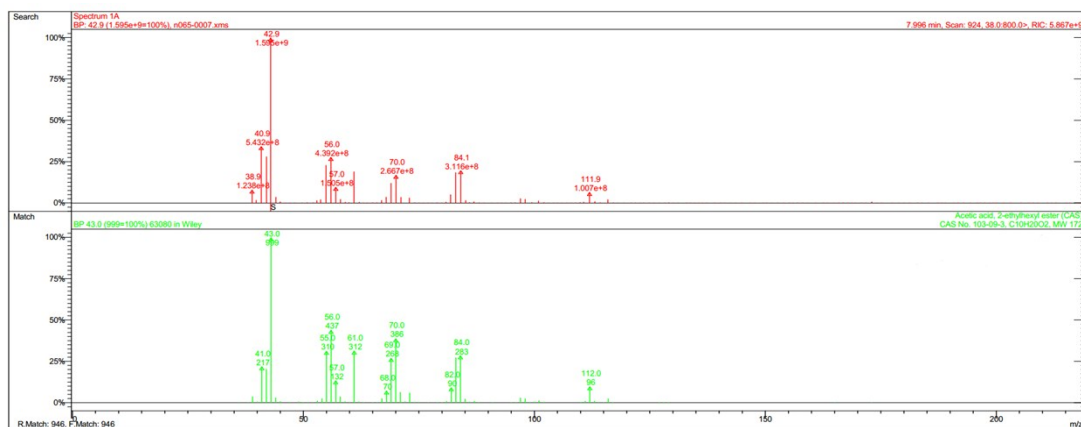

(8) The GC-MS spectra of iso-octyl acetate

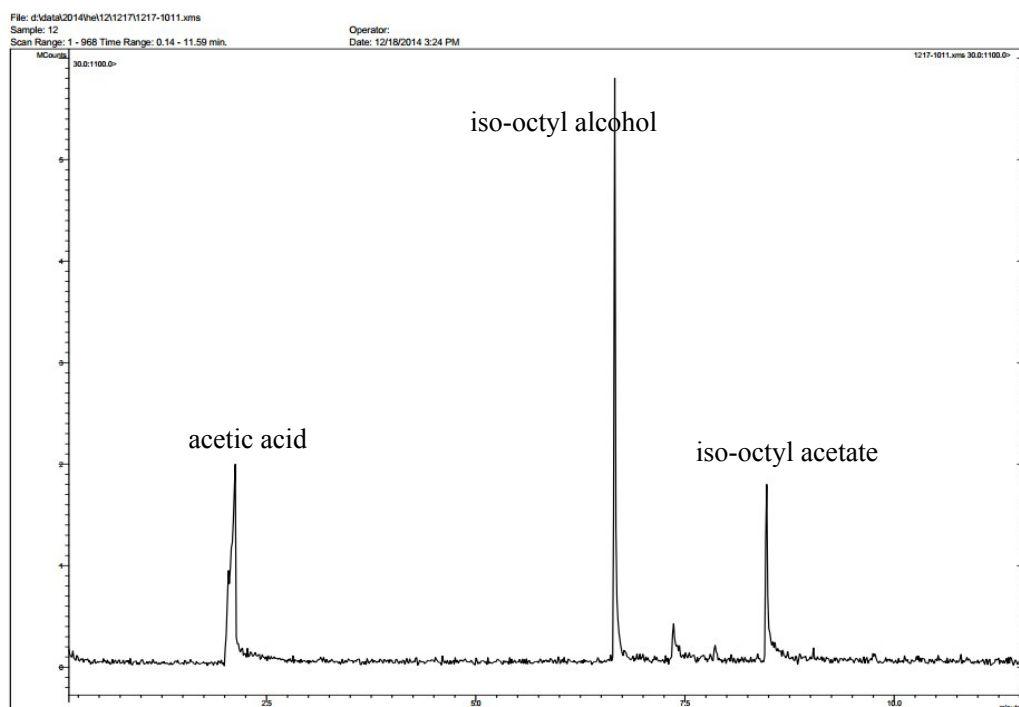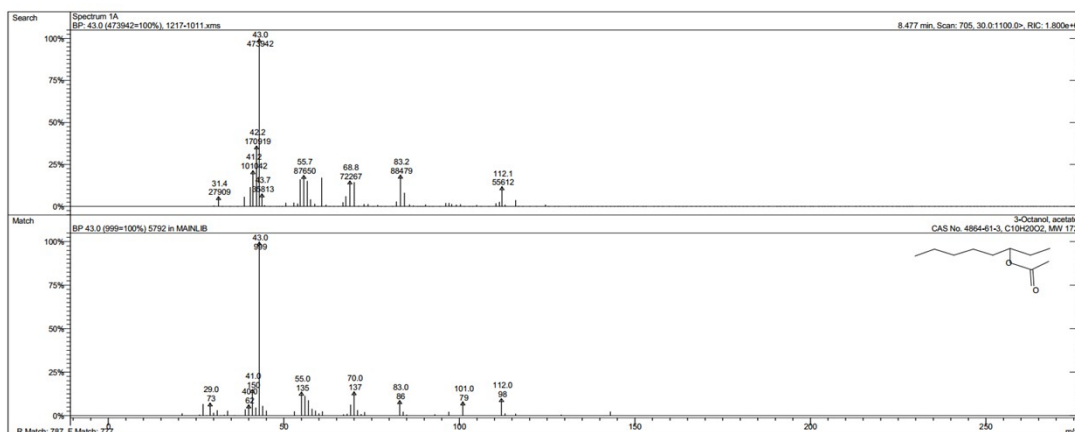

(9) The GC-MS spectra of cyclohexyl acetate

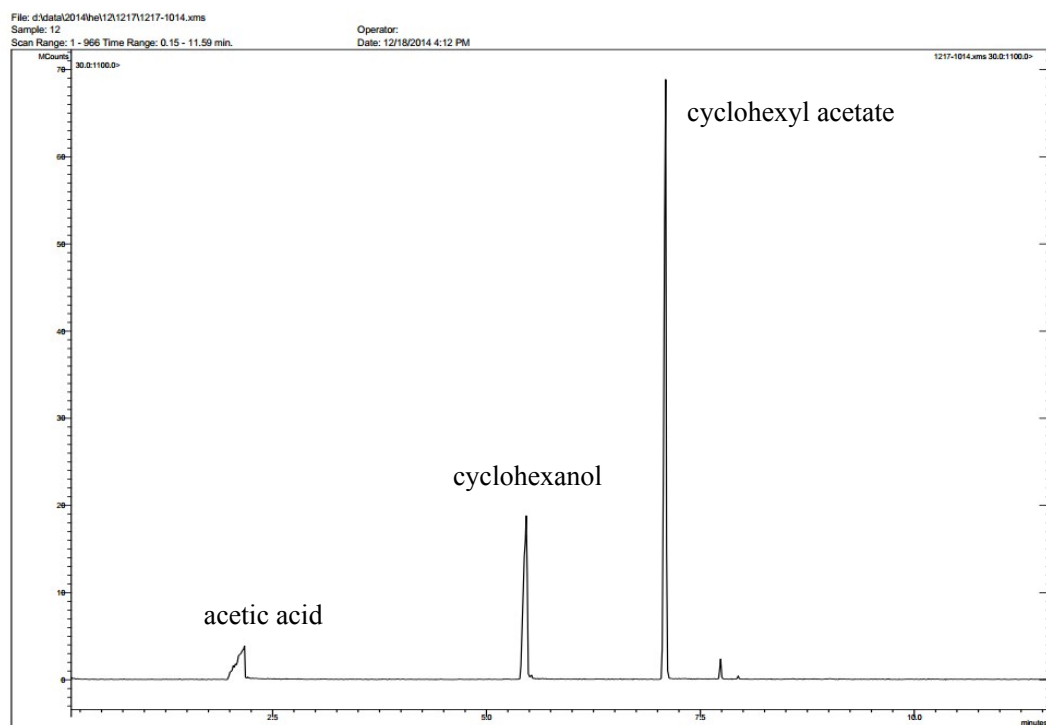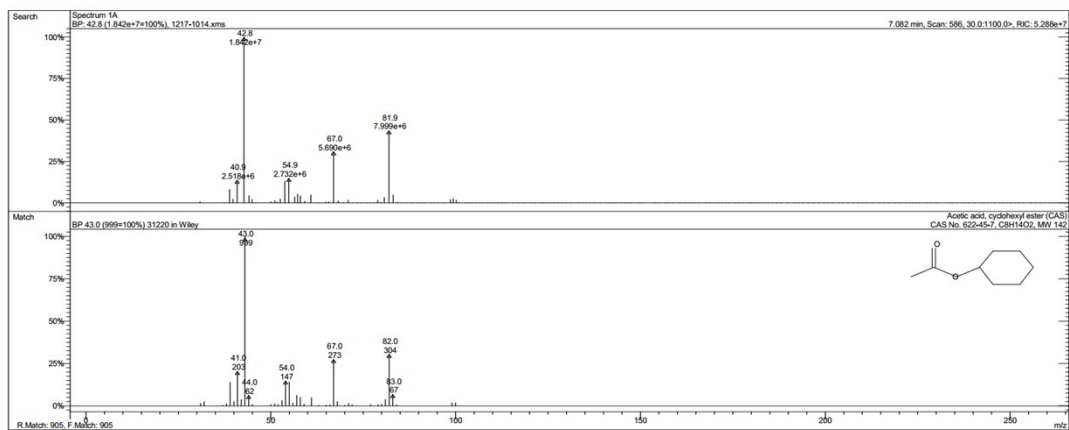

## (10) The GC-MS spectra of phenyl acetate

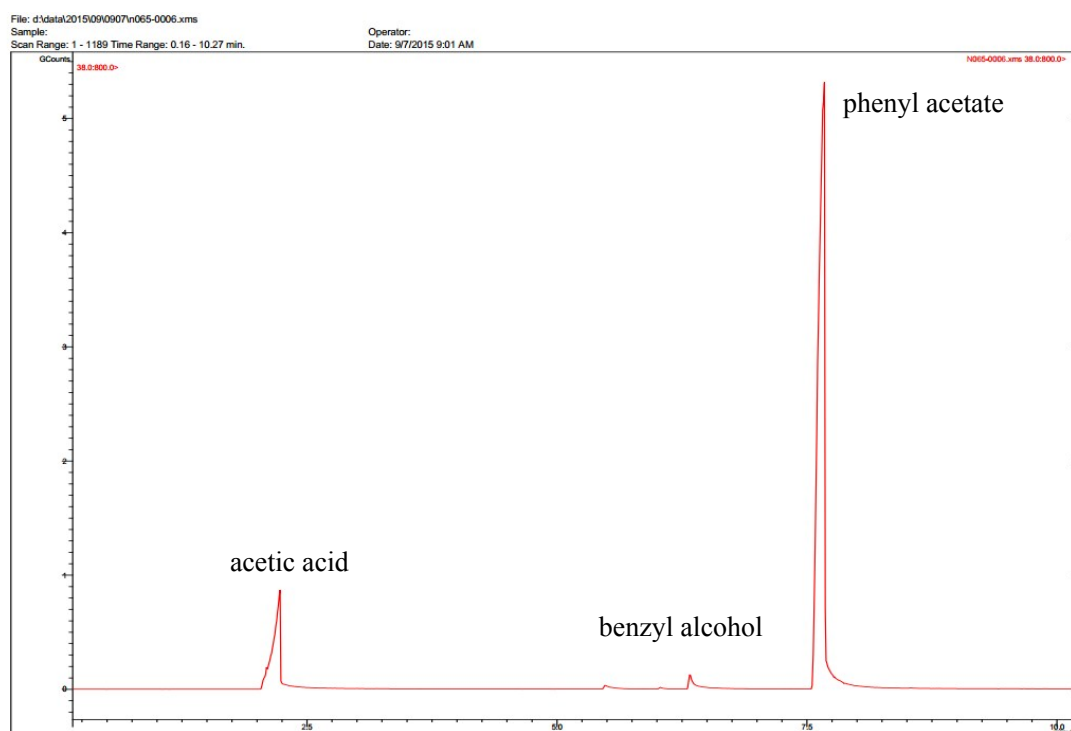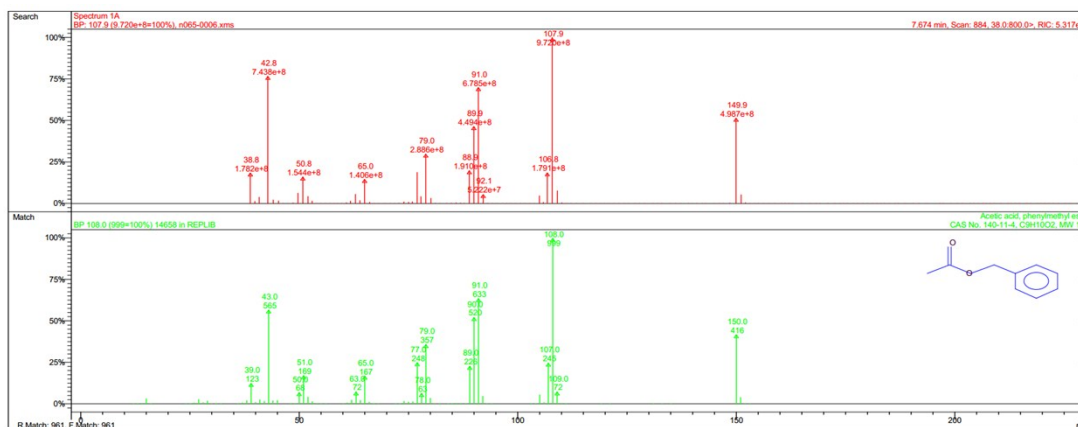

(11) The GC-MS spectra of butyl formate

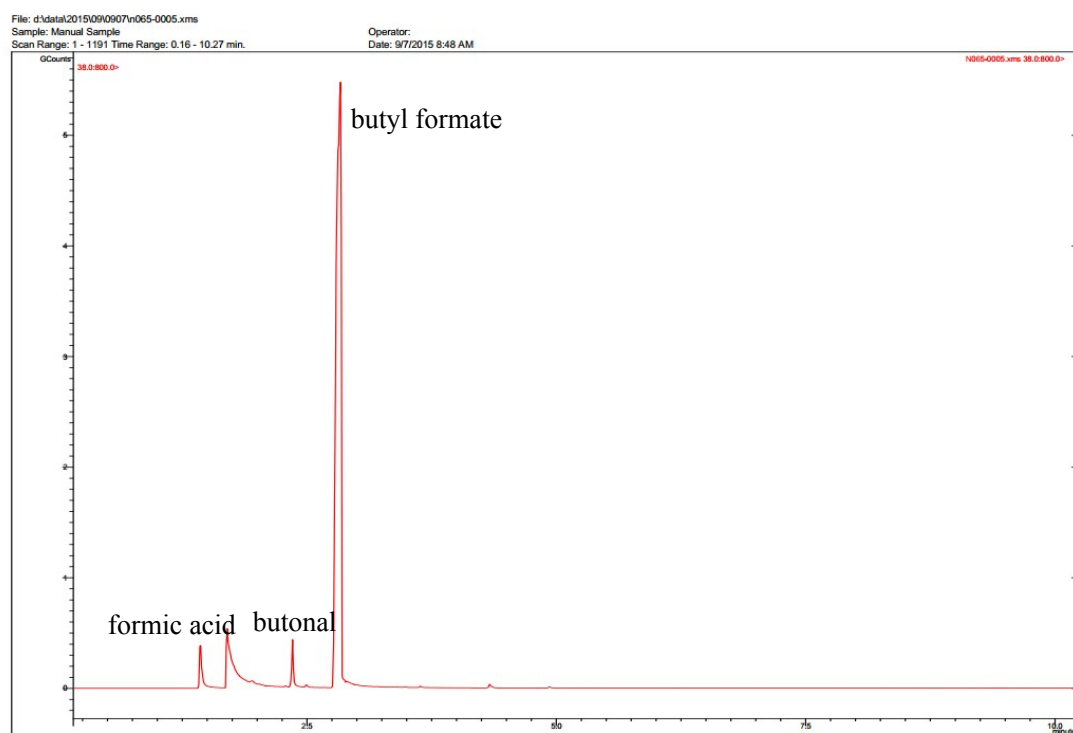

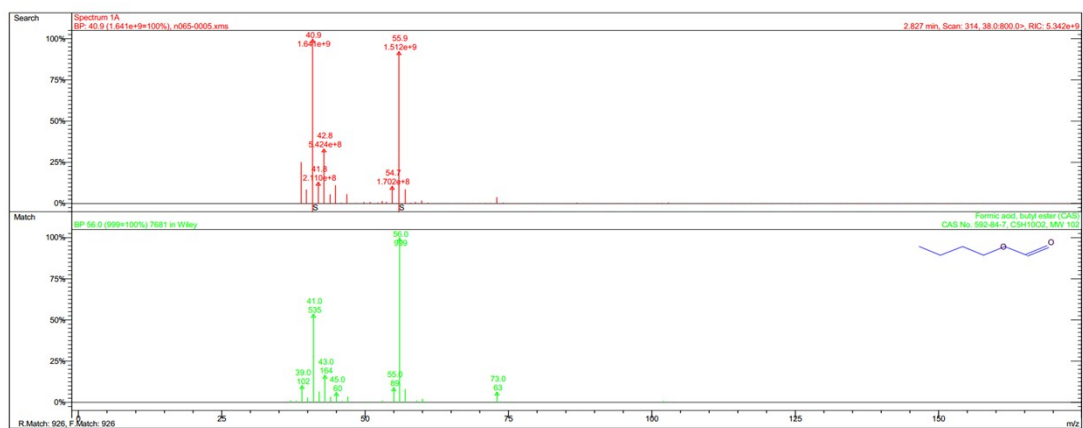

(12) The GC-MS spectra of butyl propionate

File: d:\data\2015040416v029-0.xms  
 Sample:  
 Scan Range: 1 - 1831 Time Range: 0.15 - 19.83 min.

Operator:  
 Date: 4/16/2015 9:42 AM

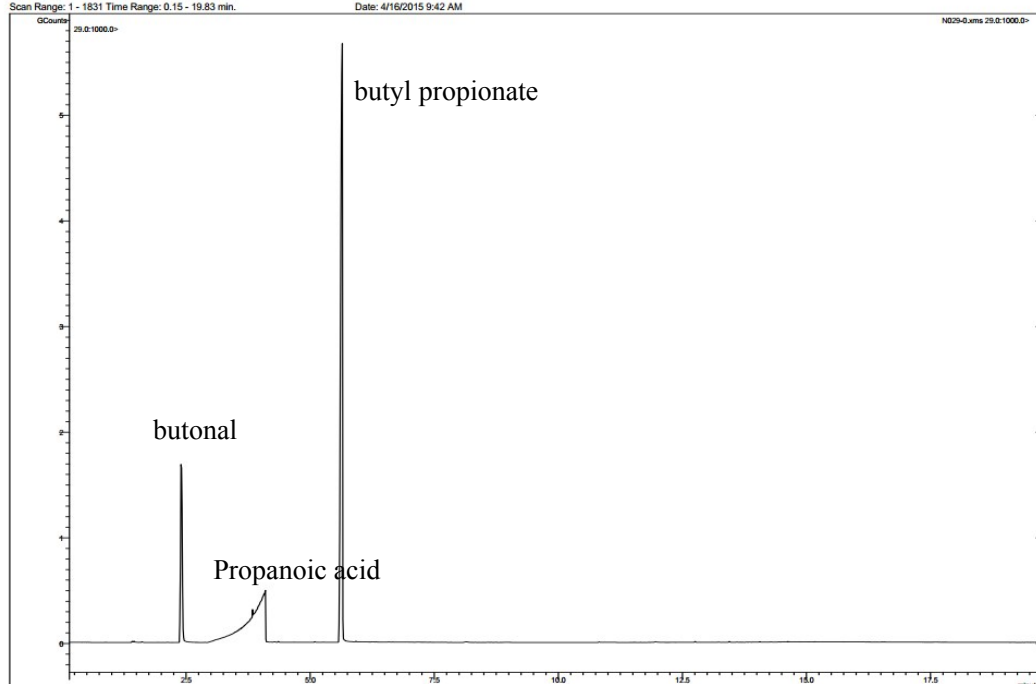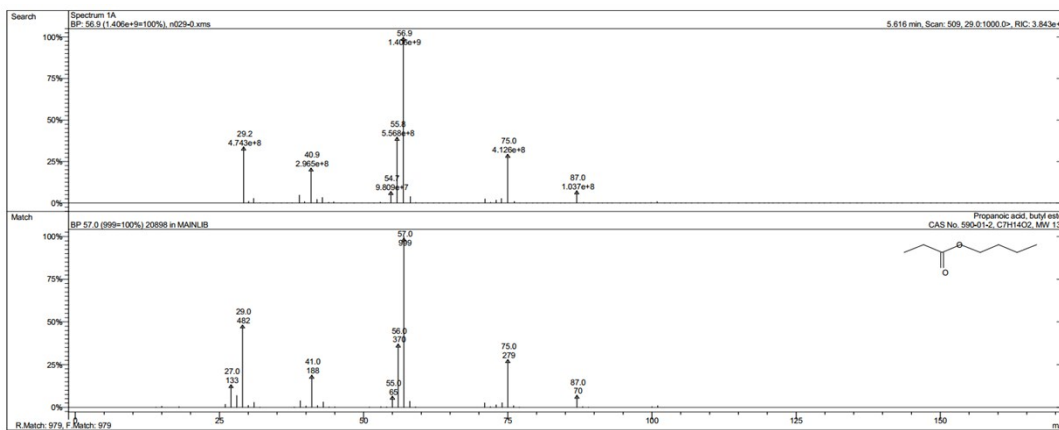

### (13) The GC-MS spectra of butyl butyrate

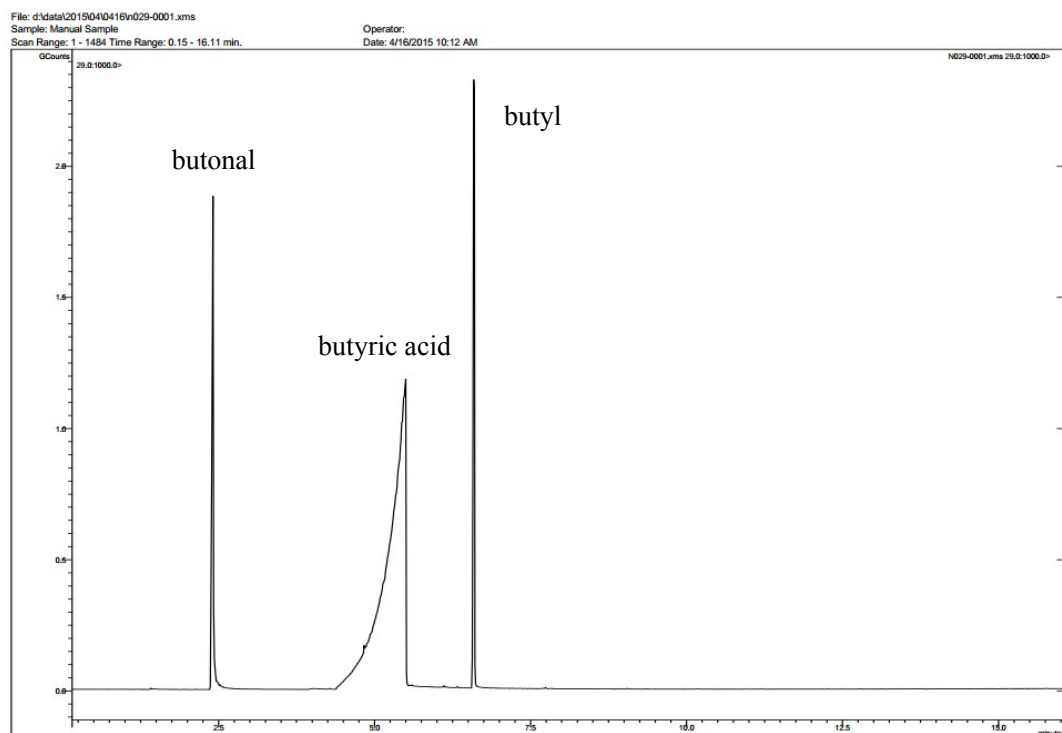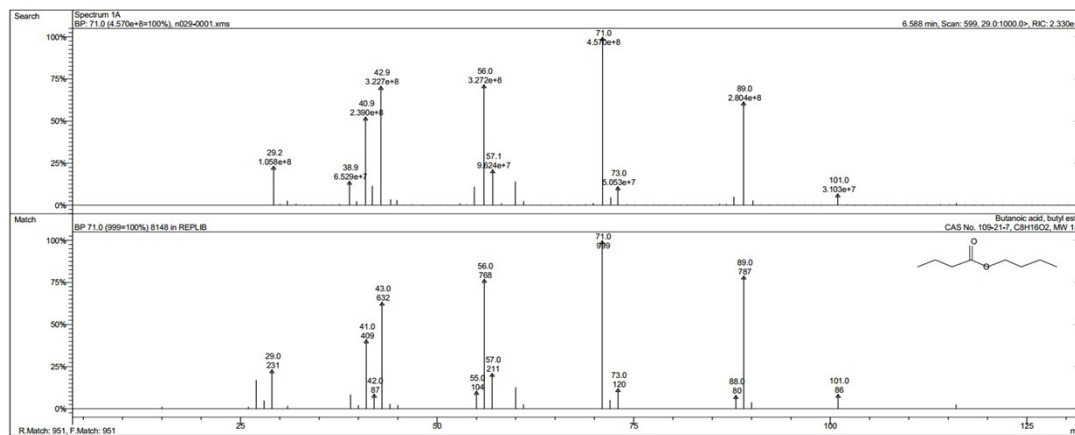



(14) The GC-MS spectra of 2-chloroethyl acetate

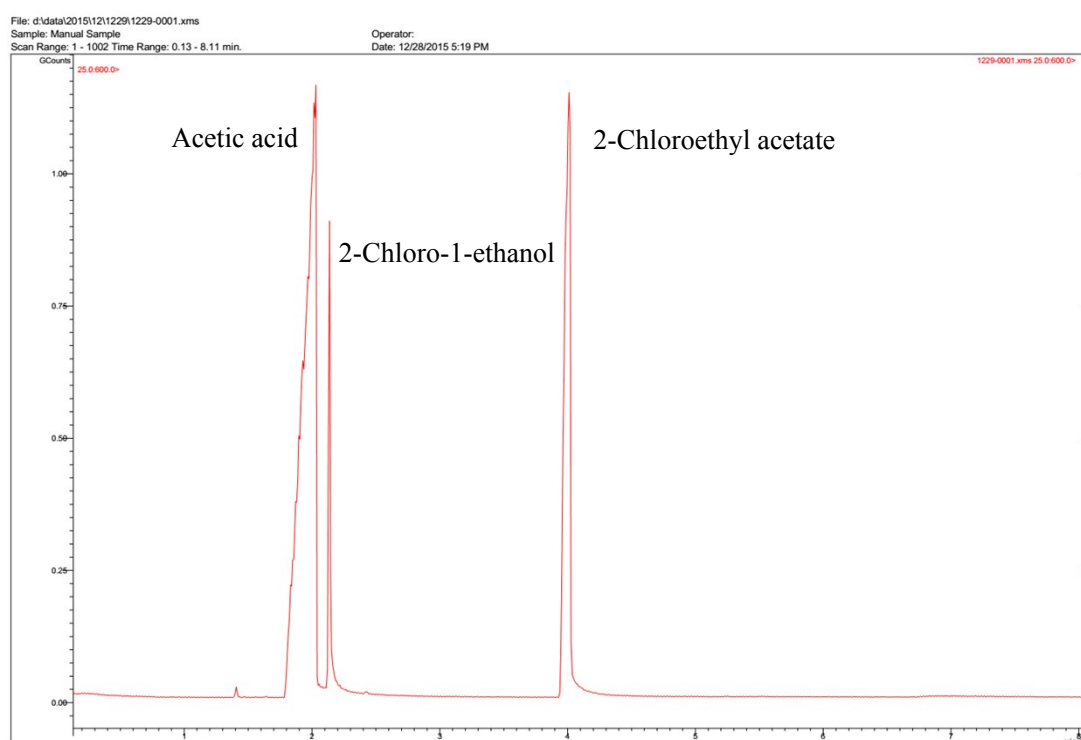

Scan 485 from d:\data\2015\12\1229\1229-0001.xms

Entry 2563 from REPLIB NIST Library

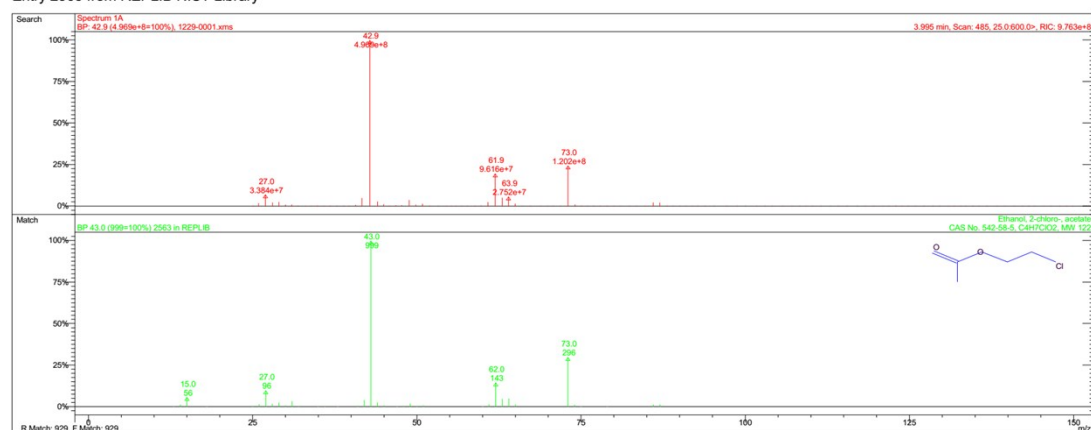

(15) The GC-MS spectra of propargyl acetate

File: d:\data\2015\12\1229\1229-0002.xms  
 Sample: Manual Sample  
 Scan Range: 1 - 1001 Time Range: 0.13 - 8.11 min.

Operator:  
 Date: 12/29/2015 7:56 AM

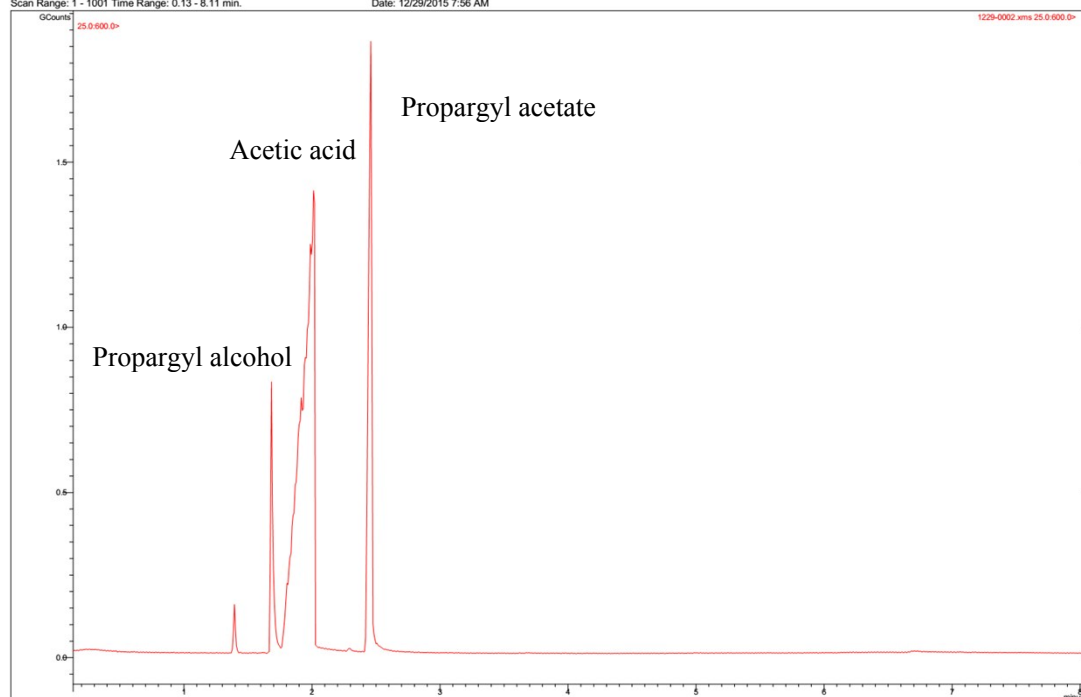

Scan 291 from d:\data\2015\12\1229\1229-0002.xms

Entry 5284 from MAINLIB NIST Library

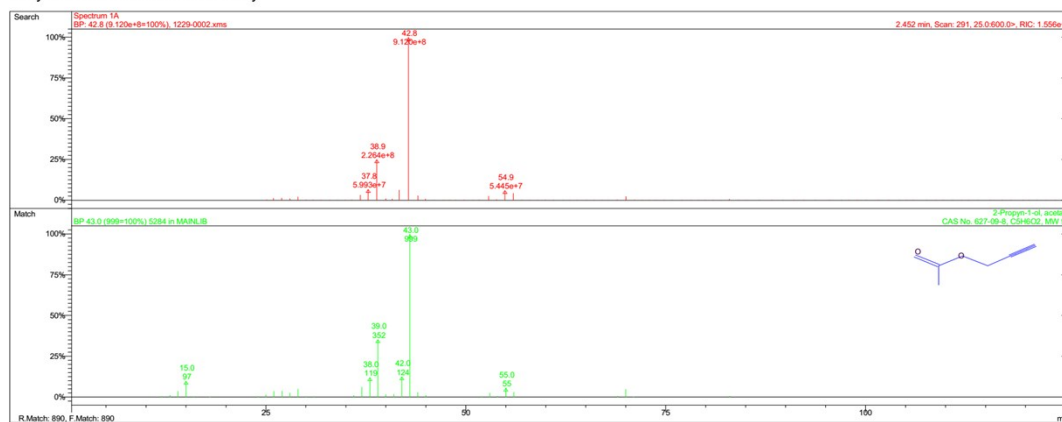

# (16) The GC-MS spectra of isoamyl formate

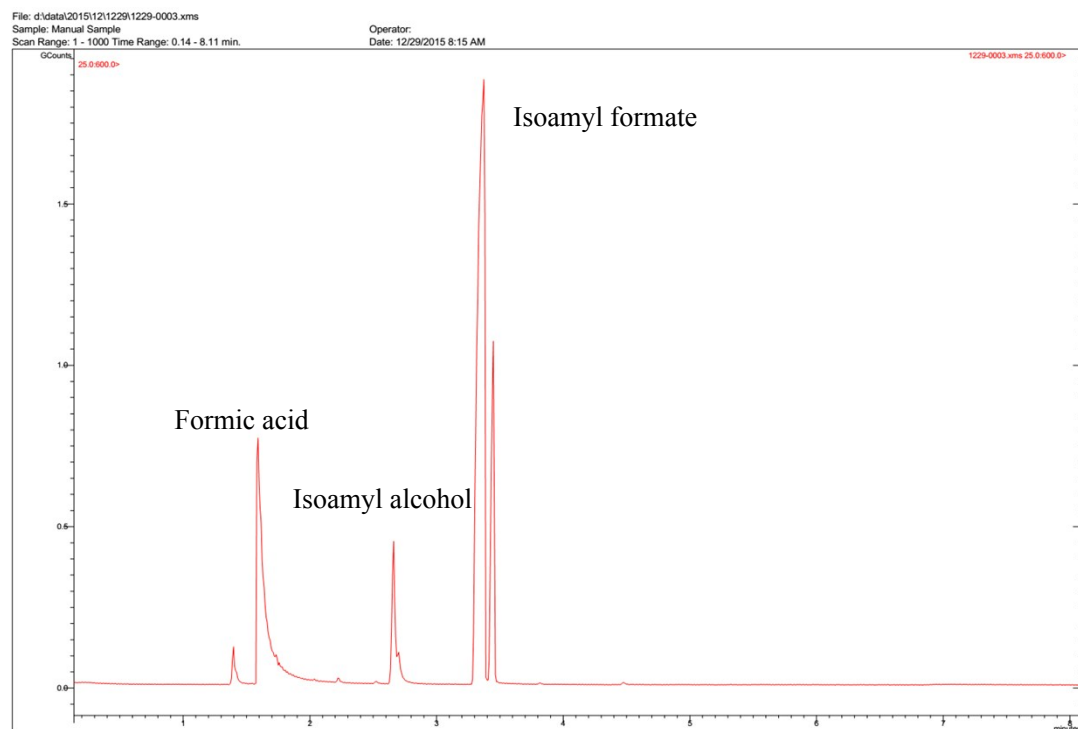

Scan 401 from d:\data\2015\12\1229\1229-0003.xml

Entry 4525 from REPLIB NIST Library

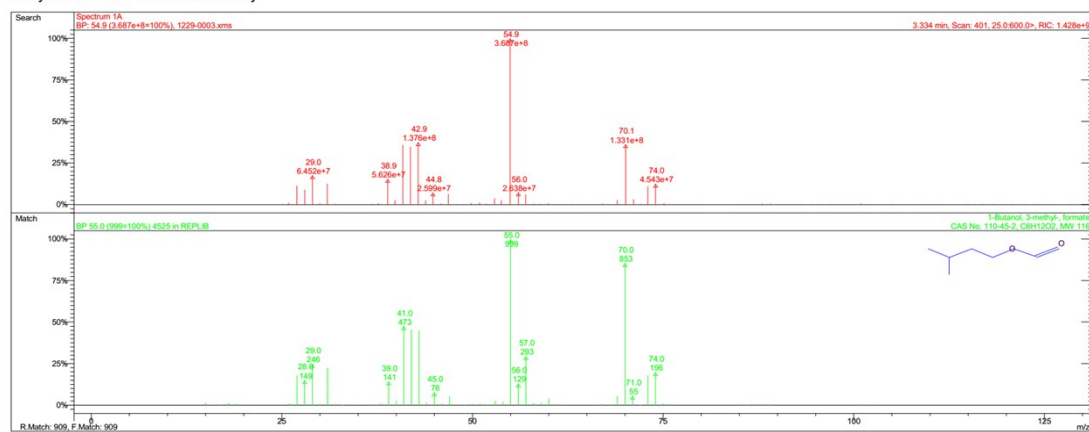

(17) The GC-MS spectra of n-hexyl formate

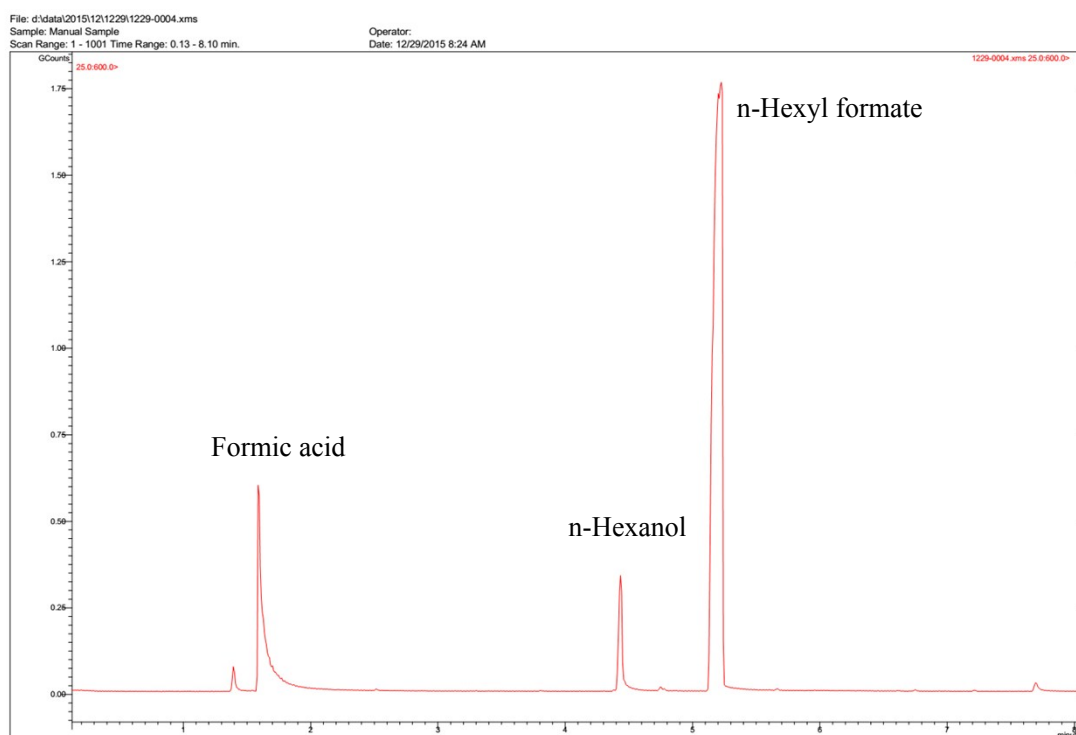

Scan 635 from d:\data\2015\12\1229\1229-0004.xms

Entry 20169 from MAINLIB NIST Library

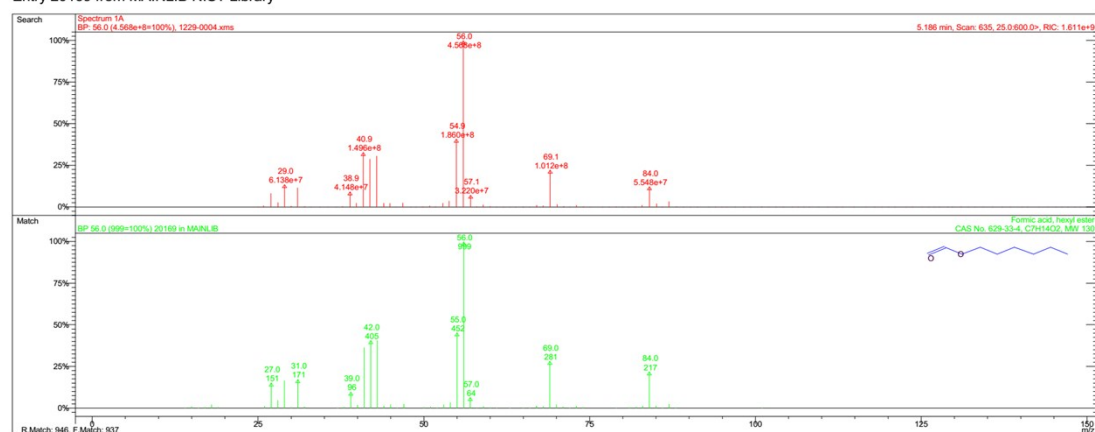

(18) The GC-MS spectra of n-octyl formate

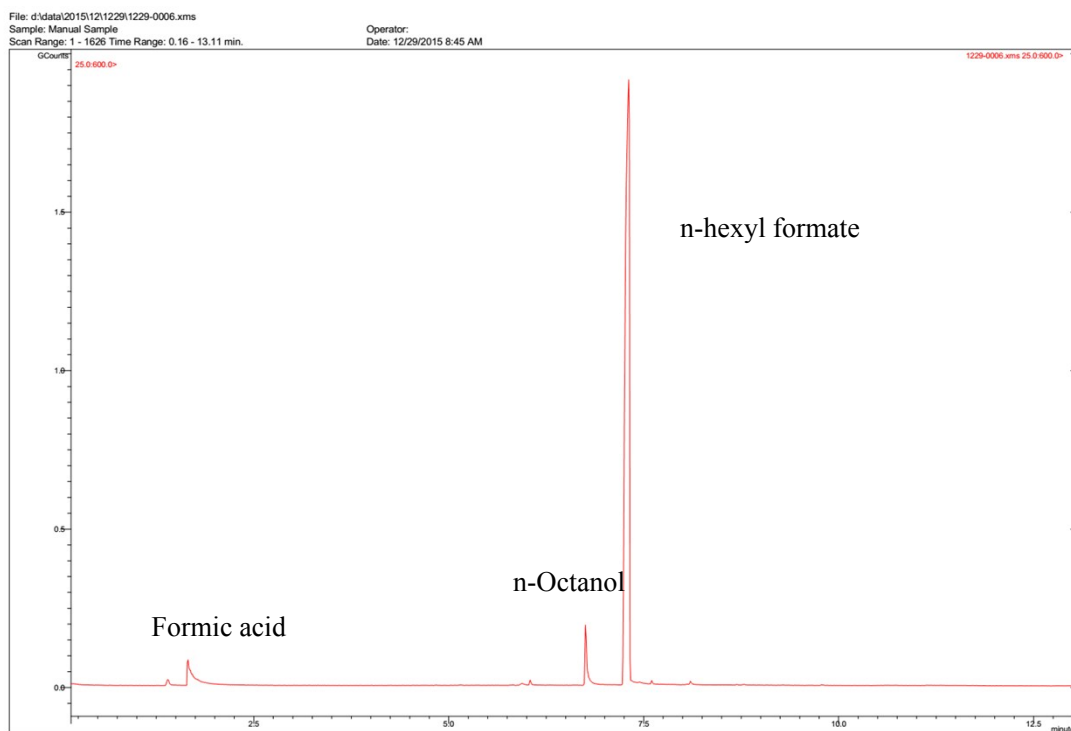

Scan 894 from d:\data\2015\12\1229\1229-0006.xml

Entry 47914 from Wiley NIST Library

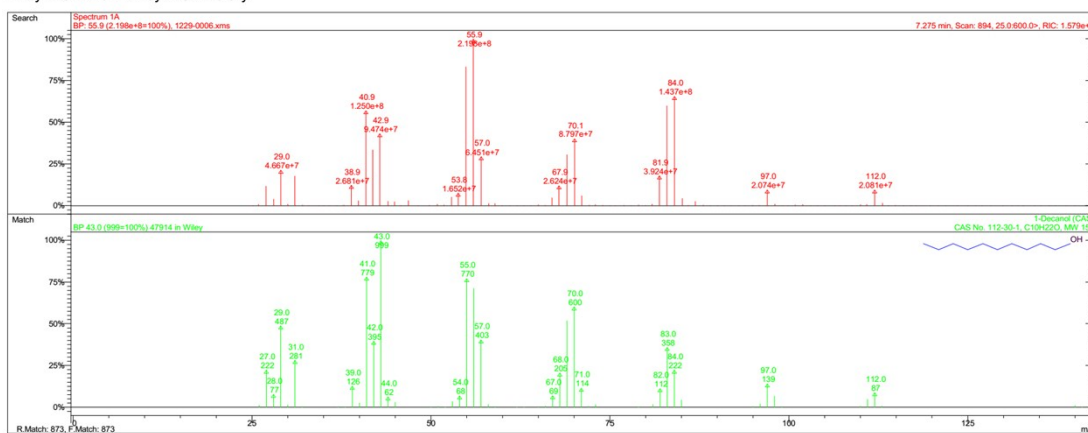

# (19) The GC-MS spectra of benzyl formate

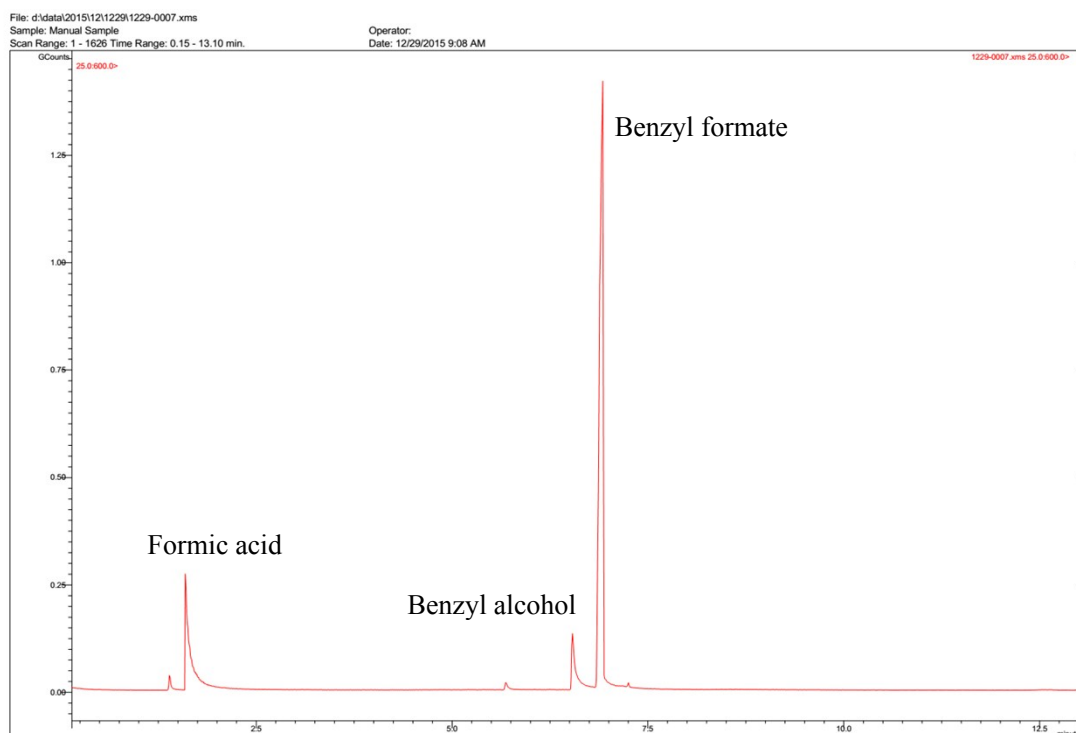

Scan 846 from d:\data\2015\12\1229\1229-0007.xms

Entry 25348 from Wiley NIST Library

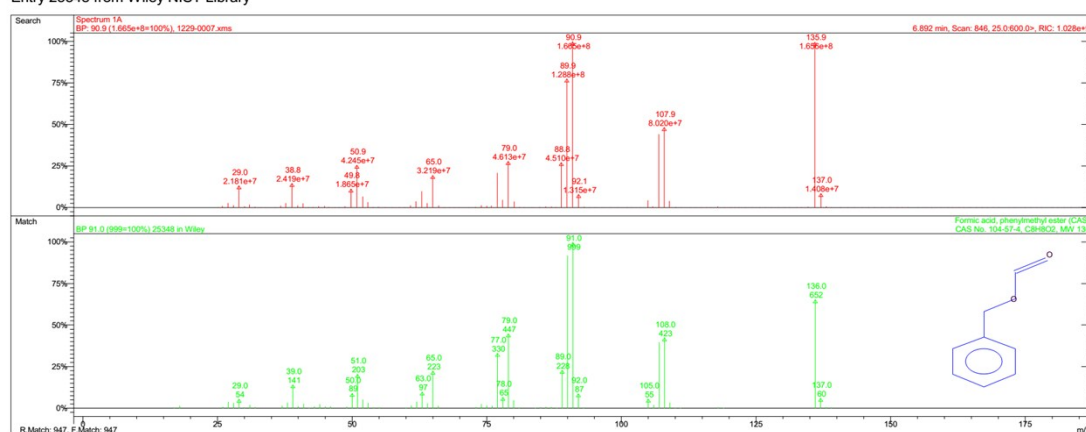

Supplement: c6ra01029f1.pdf [file c6ra01029f1.pdf]
